# Supplementary material for: Highly twisted supercoils for superelastic multi-functional fibres
Source: PubMed Central journal article supplement (PMC6347621; doi:10.1038/s41467-018-08016-w), 2019-01-25
Supplement: 41467_2018_8016_MOESM1_ESM.pdf [file 41467_2018_8016_MOESM1_ESM.pdf]

## Supplementary Information

# Highly Twisted Supercoils for Superelastic Multi-Functional Fibers

**Wonkyeong Son<sup>1§</sup>, Sungwoo Chun<sup>2§</sup>, Jae Myeong Lee<sup>1</sup>, Yourack Lee<sup>3</sup>, Jeongmin Park<sup>3</sup>, Dongseok Suh<sup>3</sup>, Duck Weon Lee<sup>4</sup>, Hachul Jung<sup>5</sup>, Young-jin Kim<sup>5</sup>, Younghoon Kim<sup>6</sup>, Soon Moon Jeong<sup>1</sup>, Sang Kyu Lim<sup>1</sup> and Changsoon Choi<sup>1\*</sup>**

<sup>1</sup>Division of Smart Textile Convergence Research, DGIST, Daegu 42988, South Korea

<sup>2</sup>Department SKKU Advanced Institute of Nanotechnology (SAINT), Sungkyunkwan University, Suwon, Gyeonggi-do 16419, South Korea

<sup>3</sup>Department of Energy Science, Sungkyunkwan University, Suwon, Gyeonggi-do 16419, South Korea

<sup>4</sup>Center for Self-powered Actuation, Department of Biomedical Engineering, Hanyang University, Seoul 04763, South Korea

<sup>5</sup>Medical Device Development Center, Osong Medical Innovation Foundation, Cheongju, Chunbuk 28160, South Korea

<sup>6</sup>Convergence Research Center for Solar Energy, DGIST, Daegu 42988, South Korea

§ These authors equally contributed to this work.

\*To whom correspondence should be addressed. E-mail:cschoi@dgist.ac.kr

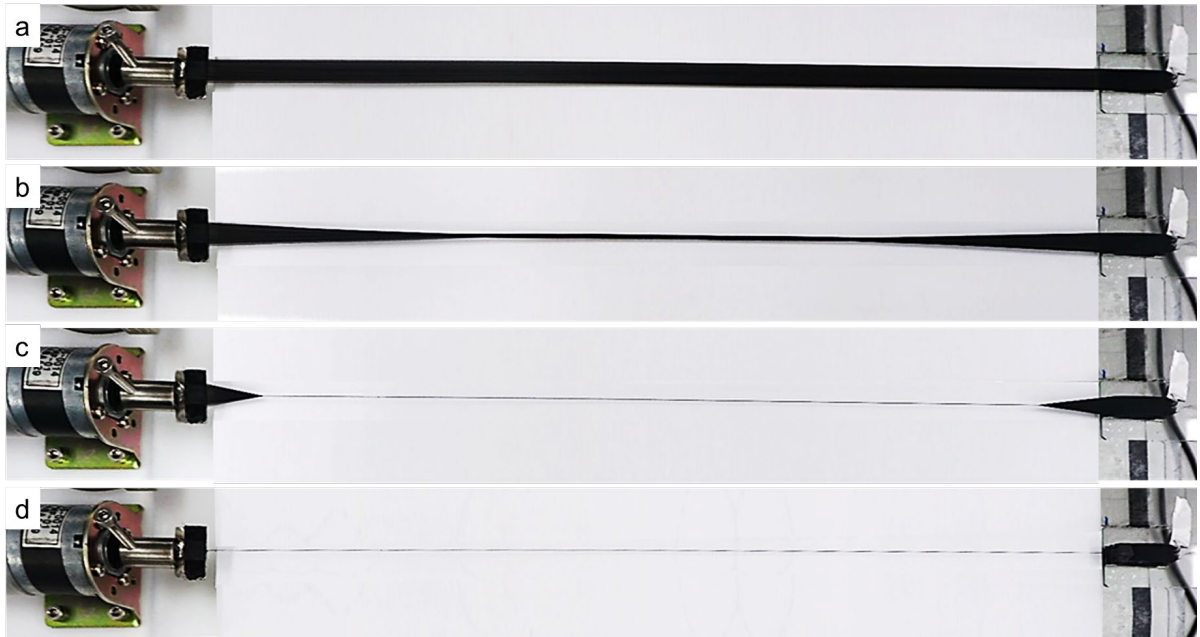

**Supplementary Figure 1.** Photographs of CNT sheets wrapping process on the stretched ( $\epsilon_{fab} = 400\%$ ) spandex core fibre

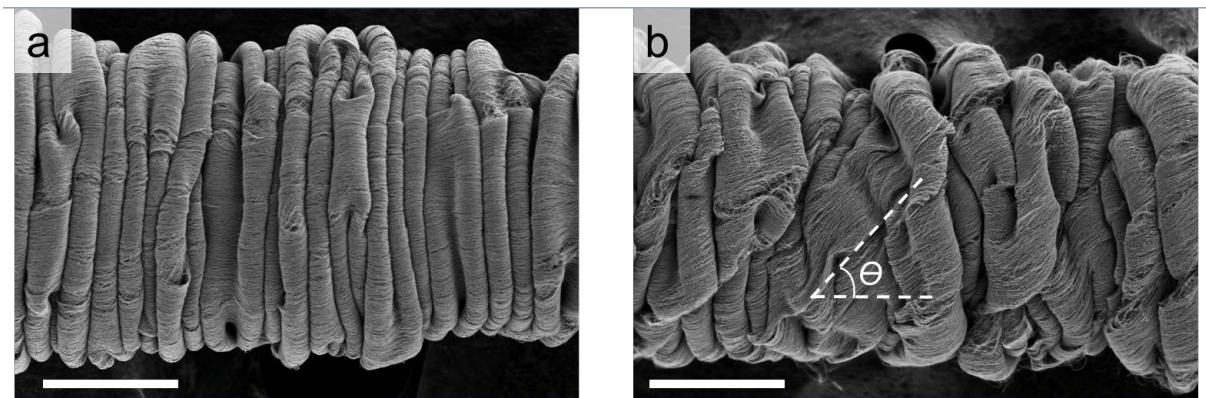

**Supplementary Figure 2.** SEM images of the spandex@CNT fibre (a) before, and (b) after twist insertion just before first-coil formation (scale bars = 100  $\mu\text{m}$ ).

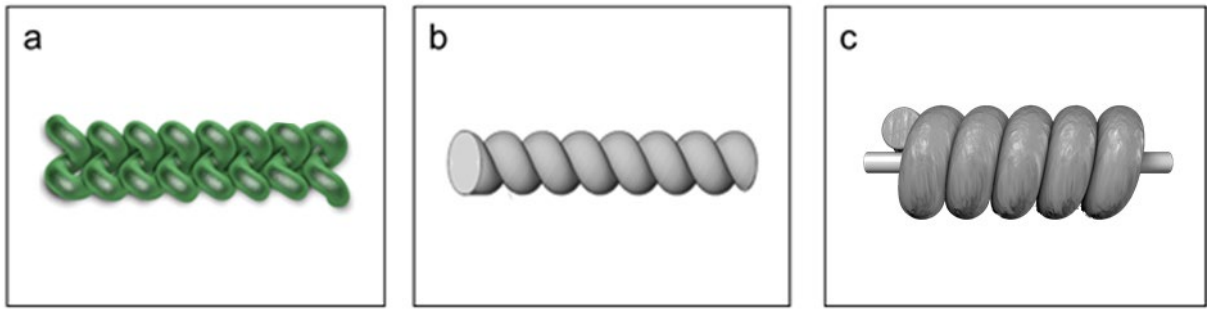

**Supplementary Figure 3.** Schematic illustrations of (a) supercoiled, (b) coiled, and (c) helical coiled fibres

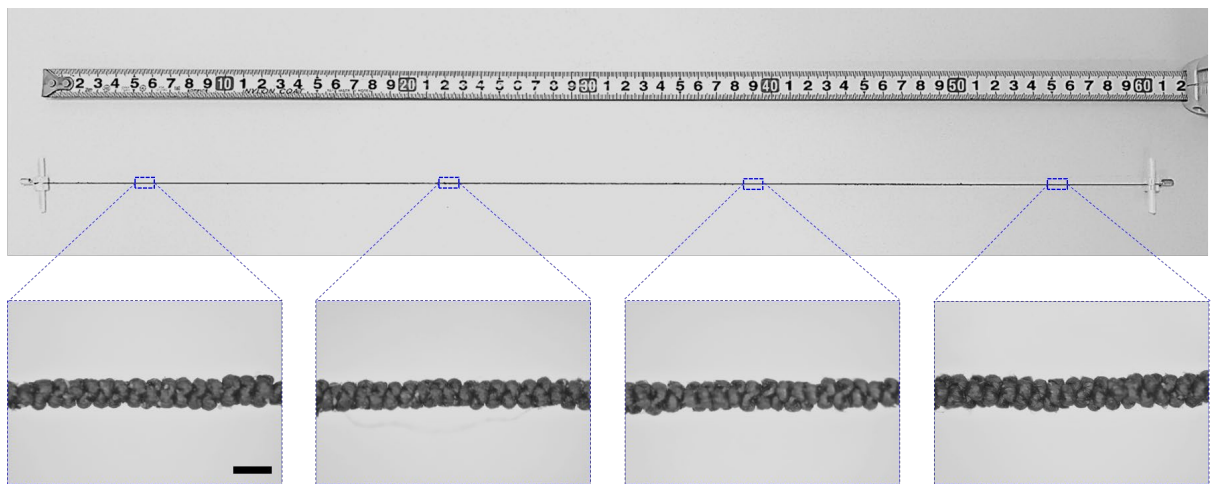

**Supplementary Figure 4.** Photograph (upper) and magnified optical images (lower) of four different spots on a 60 cm-long supercoil fibre (scale bar = 500  $\mu\text{m}$ ).

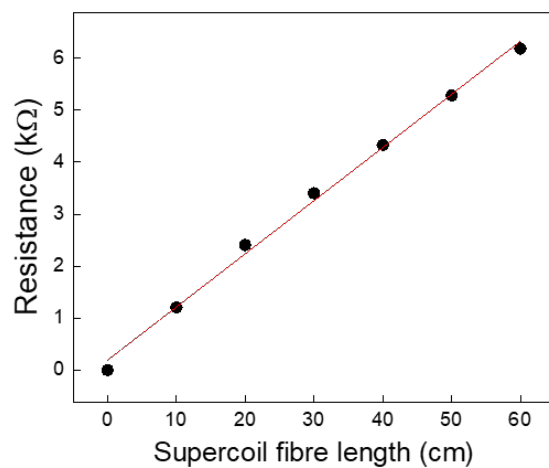

**Supplementary Figure 5.** Measured electrical resistance versus length of a 60 cm-long supercoil fibre.

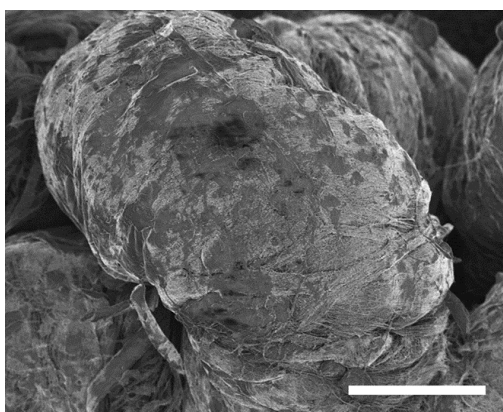

**Supplementary Figure 6.** SEM image of a SEBS-overcoated spandex@CNT supercoiled fibre (scale bars = 100  $\mu\text{m}$ )

**Supplementary Table 1.** Quality factor ( $Q$ ) comparison of presented supercoiled fibres with prior-art elastic yarn or fibre conductors

| Structures and materials (Ref. No.)                  | Stretchability      | Resistance change   | Quality factor                              |
|------------------------------------------------------|---------------------|---------------------|---------------------------------------------|
|                                                      | $[\Delta L/L_0, \%$ | $[\Delta R/R_0, \%$ | $[\Delta L \cdot R_0 / \Delta R \cdot L_0]$ |
| Spandex@ SEBS/CNT supercoiled fibres (present work)  | 1,000               | 4.19                | 238.8                                       |
| (a) Buckled CNT@sandwich structured rubber fibre (1) | 200                 | 3.7                 | 54                                          |
| (b) Buckled CNT@SEBS fibre (2)                       | 800                 |                     | 65.1                                        |
| (c) CNT@nylon coiled fibre (3)                       | 150                 | 1373.7              | 0.109                                       |
| (d) Buckled CNT@coiled rubber fibre (4)              | 400                 | 221.7               | 1.8                                         |
| (e) CNT@elastomer polymer fibre (5)                  | 700                 | 450                 | 1.55                                        |

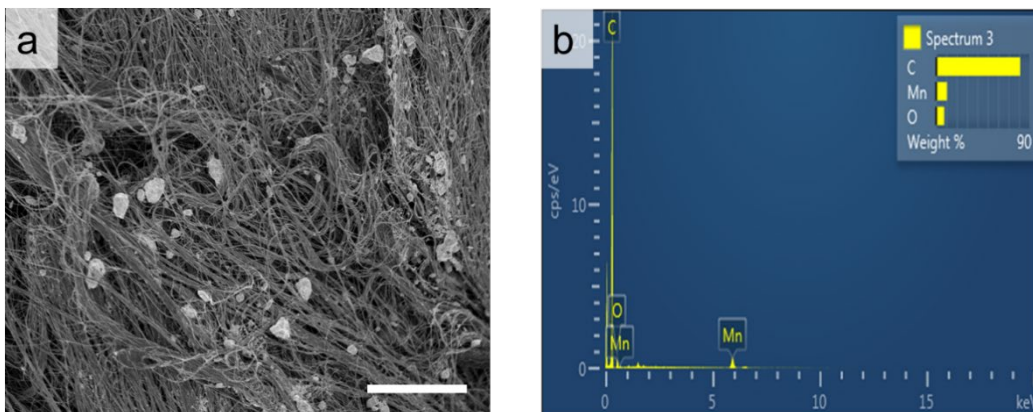

**Supplementary Figure 7.** (a) SEM image (scale bar = 10 μm), and (b) EDX elemental analysis of a MnO<sub>2</sub> coated spandex@CNT supercoiled fibre.

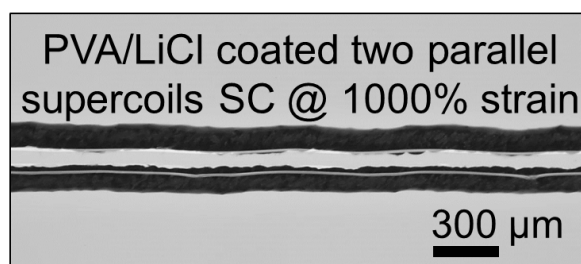

**Supplementary Figure 8.** Optical image of a supercoil based solid-state supercapacitor at 1000% tensile strain application, which comprises of two parallel, symmetric spandex@MnO<sub>2</sub>/CNT supercoil fibres and PVA/LiCl gel electrolyte coating (scale bar = 300μm).

**Supplementary Table 2.** Comparison of specific capacitance for the supercoil supercapacitor with prior-art yarn or fibre based elastic supercapacitors

| Electrode Materials (Ref. No.)                                      | $C_L$ [mF cm <sup>-1</sup> ] | $C_A$ [mF cm <sup>-2</sup> ] | Stretchability [%] |
|---------------------------------------------------------------------|------------------------------|------------------------------|--------------------|
| Spandex@MnO <sub>2</sub> /CNT supercoiled fibres (this work)        | 21.7                         | 92.1                         | 1,000              |
| MnO <sub>2</sub> /CNT@coiled nylon fibres (3)                       | 5.4                          | 40.9                         | 150                |
| Buckled MnO <sub>2</sub> /CNT@coiled rubber fibres (4)              | 4.8                          | 22.8                         | 400                |
| Buckled MnO <sub>2</sub> /CNT@sandwich structured rubber fibres (1) | 2.4                          | 11.9                         | 200                |
| PANI/CNT@elastomeric polymer fibres (5)                             | 0.9                          | 50.1                         | 400                |
| MnO <sub>2</sub> /CNT@spandex, CNT@spandex asymmetric fibres (6)    | 0.26                         | 27.9                         | 100                |
| CNT/graphene/PANI helical-coil fibres (7)                           | 10.3                         | 273.7                        | 800                |
| PEDOT-S:PSS helical-coil fibre (8)                                  |                              | 93.1                         | 400                |
| SEBS@CNT/graphene/MnO <sub>2</sub> helical-coil fibres (9)          |                              | 14                           | 850                |

## Supplementary References

1. Choi, C. *et al.* Twistable and stretchable sandwich structured fiber for wearable sensors and supercapacitors. *Nano Lett.* **16**, 7677-7684 (2016)
2. Wang, H. *et al.* Downsized sheath–core conducting fibers for weavable superelastic wires, biosensors, supercapacitors, and strain sensors. *Adv. Mater.* **28**, 4998-5007 (2016)
3. Choi, C. *et al.* Stretchable, weavable coiled carbon nanotube/MnO<sub>2</sub>/polymer fiber solid-state supercapacitors. *Sci. Rep.* **5**, 9387 (2015)
4. Choi, C. *et al.* Microscopically buckled and macroscopically coiled fibers for ultra-stretchable supercapacitors. *Adv. Energy Mater.* **7**, 1602021 (2017)
5. Zhang, Z. *et al.* Superelastic supercapacitors with high performances during stretching. *Adv. Mater.* **27**, 356-362 (2015)
6. Xu, P. *et al.* Stretchable wire-shaped asymmetric supercapacitors based on pristine and MnO<sub>2</sub> coated carbon nanotube fibers. *ACS Nano* **9**, 6088-6096 (2015)
7. Lu, Z., Foroughi, J., Wang, C., Long, H. & Wallace, G. G. Superelastic hybrid CNT/graphene fibers for wearable energy storage. *Adv. Energy Mater.* **8**, 1702047 (2018)
8. Wang, z. *et al.* All-in-one fiber for stretchable fiber-shaped tandem supercapacitors. *Nano Energy* **45**, 210-219 (2018)
9. Wang, H. *et al.* Superelastic wire-shaped supercapacitor sustaining 850% tensile strain based on carbon nanotube@graphene fiber. *Nano Research* **11**, 2347-2356 (2018)
