# Supplementary material for: Highly twisted supercoils for superelastic multi-functional fibres
Source: PubMed Central journal article supplement (PMC6347621; doi:10.1038/s41467-018-08016-w), 2019-01-25
Supplement: 41467_2018_8016_MOESM3_ESM.pdf [file 41467_2018_8016_MOESM3_ESM.pdf]

## **Description of Additional Supplementary Files**

File Name: Supplementary Movie 1

Description: Stretchable sound transmission line made of supercoiled spandex@CNT fibre

File Name: Supplementary Movie 2

Description: Stretchable video transmission line made of supercoiled spandex@CNT fibre
